# Supplementary material
Source: Copernicus journal article supplement (doi:10.5194/hess-30-1801-2026)
Supplement: Supplementary file 1 [file hess-30-1801-2026-supplement.pdf]

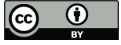

*Supplement of*

**Technical note: Efficiency of various evaporation barriers for use in automated water samplers for subsequent water isotope analysis**

**Christin Mueller et al.**

*Correspondence to:* Christin Mueller ([muller.christin@uqam.ca](mailto:muller.christin@uqam.ca))

The copyright of individual parts of the supplement might differ from the article licence.

1 **Supporting Information**

2 Table S1: Data from experiment 1

3 TB = Test Bottle, DI = DipIn-Water, R = Reference Bottle, RO = Reference Bottle open, SW = Siphon Water, BS = Blind Sample

| ID | Exposure time [days] | Volume filled [ml] | Sampled Water | DipIn | Ball-Valve | Weightloss [%] | $\delta^2\text{H}$ [‰] | $\delta^{18}\text{O}$ [‰] | d-excess [-] |
|----|----------------------|--------------------|---------------|-------|------------|----------------|------------------------|---------------------------|--------------|
| 1  | 5                    | 50                 | R             | no    | no         |                | -57,5                  | -8,34                     | 9,22         |
| 2  | 5                    | 50                 | R             | no    | no         |                | -57,8                  | -8,48                     | 10,04        |
| 3  | 5                    | 250                | R             | no    | no         |                | -58                    | -8,53                     | 10,24        |
| 4  | 5                    | 250                | R             | no    | no         |                | -58                    | -8,55                     | 10,4         |
| 5  | 5                    | 50                 | TB            | no    | yes        |                | -57,5                  | -8,36                     | 9,38         |
| 6  | 5                    | 250                | TB            | yes   | no         |                | -57,9                  | -8,52                     | 10,26        |
| 7  | 5                    | 50                 | TB            | yes   | yes        |                | -55,6                  | -7,59                     | 5,12         |
| 8  | 5                    | 250                | TB            | yes   | yes        |                | -57,9                  | -8,53                     | 10,34        |
| 9  | 5                    | 250                | RO            | no    | no         |                | -55,5                  | -7,48                     | 4,34         |
| 10 | 5                    | 250                | R             | no    | no         |                | -58,1                  | -8,53                     | 10,14        |
| 11 | 5                    | 50                 | R             | no    | no         | -0,06          | -57,6                  | -8,41                     | 9,68         |
| 12 | 5                    | 50                 | R             | no    | no         | -0,02          | -57,9                  | -8,5                      | 10,1         |
| 13 | 5                    | 250                | R             | no    | no         | 0,00           | -57,7                  | -8,42                     | 9,66         |
| 14 | 5                    | 250                | R             | no    | no         | 0,00           | -57,8                  | -8,42                     | 9,56         |
| 15 | 5                    | 50                 | TB            | no    | yes        | -5,34          | -57,3                  | -8,31                     | 9,18         |
| 16 | 5                    | 250                | TB            | yes   | yes        | -0,29          | -57,5                  | -8,46                     | 10,18        |
| 17 | 5                    | 50                 | TB            | yes   | yes        | -5,51          | -56,9                  | -8,3                      | 9,5          |
| 18 | 5                    | 250                | TB            | yes   | yes        | -0,25          | -57,6                  | -8,5                      | 10,4         |
| 19 | 5                    | 250                | RO            | no    | no         | -2,50          | -56                    | -8,14                     | 9,12         |
| 20 | 5                    | 250                | R             | no    | no         |                | -57,7                  | -8,5                      | 10,3         |
| 21 | 5                    | 50                 | R             | no    | no         | -0,07          | -57,6                  | -8,39                     | 9,52         |
| 22 | 5                    | 50                 | R             | no    | no         | 0,00           | -57,3                  | -8,39                     | 9,82         |
| 23 | 5                    | 250                | R             | no    | no         | 0,00           | -57,8                  | -8,41                     | 9,48         |
| 24 | 5                    | 250                | R             | no    | no         | 0,00           | -57,7                  | -8,48                     | 10,14        |
| 25 | 5                    | 50                 | TB            | no    | yes        | -0,36          | -57,5                  | -8,37                     | 9,46         |
| 26 | 5                    | 250                | TB            | no    | yes        | -0,02          | -57,8                  | -8,42                     | 9,56         |
| 27 | 5                    | 50                 | TB            | yes   | yes        | -0,12          | -57,7                  | -8,38                     | 9,34         |
| 28 | 5                    | 250                | TB            | yes   | yes        | -0,04          | -57,5                  | -8,42                     | 9,86         |
| 29 | 5                    | 50                 | TB            | yes   | yes        | -0,03          | -57,8                  | -8,41                     | 9,48         |
| 30 | 5                    | 250                | RO            | no    | no         | -0,73          | -57                    | -8,23                     | 8,84         |
| 31 | 5                    | 250                | R             | no    | no         | 0,00           | -58                    | -8,47                     | 9,76         |
| 32 | 7                    | 50                 | TB            | yes   | yes        | -0,14          | -57,3                  | -8,34                     | 9,42         |
| 33 | 7                    | 100                | TB            | yes   | yes        | -0,02          | -57,0                  | -8,37                     | 9,96         |

|    |   |     |    |     |     |        |       |       |       |
|----|---|-----|----|-----|-----|--------|-------|-------|-------|
| 34 | 7 | 150 | TB | yes | yes | -0,03  | -57,5 | -8,46 | 10,18 |
| 35 | 7 | 200 | TB | yes | yes | -0,38  | -57,9 | -8,47 | 9,86  |
| 36 | 7 | 250 | TB | yes | yes | 0,00   | -57,5 | -8,44 | 10,02 |
| 37 | 7 | 50  | R  | no  | no  | 0,04   | -57,6 | -8,5  | 10,4  |
| 38 | 7 | 250 | R  | no  | no  | 0,01   | -57,5 | -8,53 | 10,74 |
| 39 | 7 | 50  | R  | no  | no  |        | -57,5 | -8,57 | 11,06 |
| 40 | 7 | 250 | R  | no  | no  | -0,20  | -57,9 | -8,54 | 10,42 |
| 41 | 7 | 50  | RO | no  | no  | -19,54 | -45,9 | -7,18 | 11,54 |
| 42 | 7 | 250 | RO | no  | no  | -4,64  | -55,2 | -8,23 | 10,64 |
| 43 | 7 | 50  | TB | no  | yes | -1,62  | -57,6 | -8,45 | 10    |
| 44 | 7 | 100 | TB | no  | yes | -0,50  | -57,8 | -8,51 | 10,28 |
| 45 | 7 | 150 | TB | no  | yes | -0,08  | -57,8 | -8,49 | 10,12 |
| 46 | 7 | 200 | TB | no  | yes | -0,99  | -57,3 | -8,53 | 10,94 |
| 47 | 7 | 250 | TB | no  | yes | -0,19  | -57,4 | -8,48 | 10,44 |
| 48 | 7 | 50  | R  | no  | no  | -0,08  | -57,4 | -8,5  | 10,6  |
| 49 | 7 | 250 | R  | no  | no  | -0,02  | -57   | -8,48 | 10,84 |
| 50 | 7 | 50  | R  | no  | no  | -0,10  | -57,2 | -8,44 | 10,32 |
| 51 | 7 | 250 | R  | no  | no  | -0,02  | -57   | -8,48 | 10,84 |
| 52 | 7 | 50  | RO | no  | no  | -15,63 | -45,5 | -7,25 | 12,5  |
| 53 | 7 | 250 | RO | no  | no  | -3,73  | -54,5 | -8,13 | 10,54 |
| 54 | 7 | 50  | TB | no  | no  | -0,57  | -57,5 | -8,4  | 9,7   |
| 55 | 7 | 100 | TB | no  | no  | -3,25  | -57,1 | -8,39 | 10,02 |
| 56 | 7 | 150 | TB | no  | no  | -0,57  | -57,8 | -8,43 | 9,64  |
| 57 | 7 | 200 | TB | no  | no  | -2,20  | -58,1 | -8,42 | 9,26  |
| 58 | 7 | 250 | TB | no  | no  | -0,47  | -57,8 | -8,5  | 10,2  |
| 59 | 7 | 50  | R  | no  | no  | -0,04  | -57,5 | -8,47 | 10,26 |
| 60 | 7 | 250 | R  | no  | no  | 0,00   | -58   | -8,43 | 9,44  |
| 61 | 7 | 50  | R  | no  | no  | -0,02  | -58   | -8,48 | 9,84  |
| 62 | 7 | 250 | R  | no  | no  | 0,00   | -58,4 | -8,47 | 9,36  |
| 63 | 7 | 50  | RO | no  | no  | -23,98 | -40,4 | -6,58 | 12,24 |
| 64 | 7 | 250 | RO | no  | no  | -5,51  | -54,6 | -8,02 | 9,56  |
| 65 | 7 | 50  | SW | yes | yes |        | -56,9 | -8,44 | 10,62 |
| 66 | 7 | 50  | SW | no  | yes |        | -57   | -8,1  | 7,8   |
| 67 | 7 | 50  | SW | no  | no  |        | -55,9 | -7,77 | 6,26  |
| 68 | 7 | 100 | SW | yes | yes |        | -56,8 | -8,25 | 9,2   |
| 69 | 7 | 100 | SW | no  | yes |        | -55   | -7,49 | 4,92  |
| 70 | 7 | 100 | SW | no  | no  |        | -53,8 | -7,2  | 3,8   |
| 71 | 7 | 150 | SW | yes | yes |        | -57,4 | -8,4  | 9,8   |
| 72 | 7 | 150 | SW | no  | yes |        | -57,2 | -8,45 | 10,4  |
| 73 | 7 | 150 | SW | no  | no  |        | -56,8 | -8,11 | 8,08  |

|     |    |     |    |     |     |        |       |       |       |
|-----|----|-----|----|-----|-----|--------|-------|-------|-------|
| 74  | 7  | 200 | SW | yes | yes |        | -57,4 | -8,48 | 10,44 |
| 75  | 7  | 200 | SW | no  | yes |        | -56,8 | -8,32 | 9,76  |
| 76  | 7  | 200 | SW | no  | no  |        | -57,1 | -8,25 | 8,9   |
| 77  | 7  | 250 | SW | yes | yes |        | -57,6 | -8,4  | 9,6   |
| 78  | 7  | 250 | SW | no  | yes |        | -55,9 | -7,99 | 8,02  |
| 79  | 7  | 250 | SW | no  | no  |        | -54,3 | -7,26 | 3,78  |
| 80  | 20 | 50  | TB | yes | no  | -0,26  | -55,4 | -8,14 | 9,72  |
| 81  | 20 | 50  | TB | yes | no  | -0,09  | -55,5 | -8,29 | 10,82 |
| 82  | 20 | 250 | TB | yes | no  | -0,08  | -55,7 | -8,23 | 10,14 |
| 83  | 20 | 250 | TB | yes | no  | -0,06  | -55,3 | -8,24 | 10,62 |
| 84  | 20 | 50  | R  | no  | no  | 0,02   | -55,4 | -8,25 | 10,6  |
| 85  | 20 | 50  | RO | no  | no  | -49,38 | -14,4 | -3,33 | 12,24 |
| 86  | 20 | 250 | R  | no  | no  | 0,01   | -55,4 | -8,2  | 10,2  |
| 87  | 20 | 250 | RO | no  | no  | -11,12 | -47,1 | -7,25 | 10,9  |
| 88  | 20 | 50  | SW | yes | no  |        | -55,1 | -7,96 | 8,58  |
| 89  | 20 | 50  | SW | yes | no  |        | -49,4 | -5,94 | -1,88 |
| 90  | 20 | 250 | SW | yes | no  |        | -54,9 | -8    | 9,1   |
| 91  | 20 | 250 | SW | yes | no  |        | -54,8 | -8,03 | 9,44  |
| 92  | 21 | 50  | TB | no  | no  | -3,30  | -57,4 | -8,39 | 9,72  |
| 93  | 21 | 100 | TB | no  | no  | -2,61  | -57,6 | -8,39 | 9,52  |
| 94  | 21 | 150 | TB | no  | no  | -0,30  | -57,6 | -8,47 | 10,16 |
| 95  | 21 | 200 | TB | no  | no  | -0,37  | -57,8 | -8,49 | 10,12 |
| 96  | 21 | 250 | TB | no  | no  | -0,17  | -57,8 | -8,41 | 9,48  |
| 97  | 21 | 50  | R  | no  | no  | -0,02  | -58,1 | -8,43 | 9,34  |
| 98  | 21 | 250 | R  | no  | no  | -0,01  | -58   | -8,5  | 10    |
| 99  | 21 | 50  | R  | no  | no  | -0,04  | -58,2 | -8,51 | 9,88  |
| 100 | 21 | 250 | R  | no  | no  | -0,01  | -58,1 | -8,56 | 10,38 |
| 101 | 21 | 50  | RO | no  | no  | -58,36 | -3,8  | -2,49 | 16,12 |
| 102 | 21 | 250 | RO | no  | no  | -11,95 | -49,1 | -7,42 | 10,26 |
| 103 | 21 | 50  | SW | no  | no  |        | -54,3 | -7,24 | 3,62  |
| 104 | 21 | 100 | SW | no  | no  |        | -54,9 | -7,52 | 5,26  |
| 105 | 21 | 150 | SW | no  | no  |        | -56,7 | -8,09 | 8,02  |
| 106 | 21 | 200 | SW | no  | no  |        | -56,2 | -7,78 | 6,04  |
| 107 | 21 | 250 | SW | no  | no  |        | -57,5 | -8,19 | 8,02  |
| 108 |    |     | BS |     |     |        | -55   | -8,16 | 10,28 |
| 109 |    |     | BS |     |     |        | -55,2 | -8,25 | 10,8  |

5 Table S2: Data from experiment 2

6 TB = Test Bottle, DI = DipIn-Water, R = Reference Bottle, RO = Reference Bottle open, BS = Blind Sample, S = Standard

| ID<br>d=DipIn | Exposure<br>time<br>[days] | Volume<br>filled<br>[ml] | Weightloss<br>[%] | Sampled<br>Water | $\delta^2\text{H}$<br>[‰] | $\delta^{18}\text{O}$<br>[‰] | d-excess<br>[-] |
|---------------|----------------------------|--------------------------|-------------------|------------------|---------------------------|------------------------------|-----------------|
| 1             | 26                         | 50                       | 1,47              | TB               | -55,4                     | -8,11                        | 9,48            |
| 2             | 26                         | 50                       | -0,41             | TB               | -55,6                     | -8,08                        | 9,04            |
| 3             | 13                         | 50                       | -0,26             | TB               | -55,3                     | -8,18                        | 10,14           |
| 4             | 39                         | 50                       | -0,64             | TB               | -54,9                     | -8,01                        | 9,18            |
| 5             | 39                         | 50                       | -0,60             | TB               | -54,9                     | -8,01                        | 9,18            |
| 6             | 52                         | 50                       | -0,78             | TB               | -55,1                     | -7,94                        | 8,42            |
| 7             | 13                         | 50                       | -0,33             | TB               | -55,5                     | -8,16                        | 9,78            |
| 8             | 52                         | 50                       | -1,13             | TB               | -54,9                     | -7,92                        | 8,46            |
| 9             | 13                         | 250                      | -0,07             | TB               | -55,5                     | -8,19                        | 10,02           |
| 10            | 52                         | 250                      | -0,21             | TB               | -55,4                     | -8,1                         | 9,4             |
| 11            | 26                         | 250                      | -0,09             | TB               | Measurement               | error                        |                 |
| 12            | 26                         | 250                      | -0,06             | TB               | -56                       | -8,17                        | 9,36            |
| 13            | 39                         | 250                      | -0,13             | TB               | -55                       | -8,15                        | 10,2            |
| 14            | 52                         | 250                      | -0,13             | TB               | -55,5                     | -8,11                        | 9,38            |
| 15            | 13                         | 250                      | -0,05             | TB               | -55,9                     | -8,28                        | 10,34           |
| 16            | 13                         | 50                       | 0,00              | R                | -55,9                     | -8,25                        | 10,1            |
| 17            | 26                         | 50                       | 0,10              | R                | -56                       | -8,2                         | 9,6             |
| 18            | 39                         | 50                       | -0,04             | R                | -55,4                     | -8,2                         | 10,2            |
| 19            | 52                         | 50                       | 0,04              | R                | -55,6                     | -8,19                        | 9,92            |
| 20            | 13                         | 50                       | -30,45            | RO               | -34                       | -5,37                        | 8,96            |
| 21            | 26                         | 50                       | -57,96            | RO               | -6,9                      | -1,81                        | 7,58            |
| 22            | 39                         | 50                       | -79,64            | RO               | 30,9                      | 2,58                         | 10,26           |
| 23            | 52                         | 50                       | -100,00           | RO               | water                     | is                           | evaporated      |
| 24            | 13                         | 250                      | 0,03              | R                | -56,2                     | -8,23                        | 9,64            |
| 25            | 26                         | 250                      | 0,03              | R                | -55,5                     | -8,17                        | 9,86            |
| 26            | 39                         | 250                      | 0,02              | R                | -54,5                     | -8,23                        | 11,34           |
| 27            | 52                         | 250                      | 0,03              | R                | -55,6                     | -8,2                         | 10              |
| 28            | 13                         | 250                      | -7,03             | RO               | -51,4                     | -7,59                        | 9,32            |
| 29            | 26                         | 250                      | -12,61            | RO               | -46,6                     | -6,96                        | 9,08            |
| 30            | 39                         | 250                      | -19,79            | RO               | -40,1                     | -6,26                        | 9,98            |
| 31            | 52                         | 250                      | -26,32            | RO               | -35                       | -5,68                        | 10,44           |
| 32            | 26                         | 50                       | -0,36             | TB               | -55,2                     | -8,06                        | 9,28            |
| 33            | 26                         | 50                       | -0,36             | TB               | -55,6                     | -8,08                        | 9,04            |
| 34            | 26                         | 250                      | -0,10             | TB               | -55,9                     | -8,14                        | 9,22            |
| 35            | 26                         | 250                      | -0,10             | TB               | -55,8                     | -8,2                         | 9,8             |
| 36            | 26                         | 250                      | -0,09             | TB               | -55,6                     | -8,13                        | 9,44            |
| 37            | 26                         | 50                       | -0,04             | R                | -55,6                     | -8,19                        | 9,92            |
| 38            | 26                         | 250                      | 0,00              | R                | -55,6                     | -8,22                        | 10,16           |
| 39            | 26                         | 50                       | -57,57            | RO               | -0,3                      | -1,37                        | 10,66           |
| 40            | 26                         | 250                      | -12,91            | RO               | -45,2                     | -6,9                         | 10              |

|         |    |     |    |             |       |        |
|---------|----|-----|----|-------------|-------|--------|
| 1d      | 26 | 50  | DI | -54,6       | -7,93 | 8,84   |
| 2d      | 26 | 50  | DI | -54,4       | -7,63 | 6,64   |
| 3d      | 13 | 50  | DI | -51,7       | -6,83 | 2,94   |
| 4d      | 39 | 50  | DI | -44,8       | -4,12 | -11,84 |
| 5d      | 39 | 50  | DI | -55,1       | -7,82 | 7,46   |
| 6d      | 52 | 50  | DI | -54,4       | -7,78 | 7,84   |
| 7d      | 13 | 50  | DI | -51,3       | -6,44 | 0,22   |
| 8d      | 52 | 50  | DI | -54,7       | -7,79 | 7,62   |
| 9d      | 13 | 250 | DI | -52,1       | -6,74 | 1,82   |
| 10d     | 52 | 250 | DI | -46,3       | -4,59 | -9,58  |
| 11d     | 26 | 250 | DI | Measurement | error |        |
| 12d     | 26 | 250 | DI | -49,6       | -5,59 | -4,88  |
| 13d     | 39 | 250 | DI | -50,9       | -6,62 | 2,06   |
| 14d     | 52 | 250 | DI | -50,3       | -6    | -2,3   |
| 15d     | 13 | 250 | DI | -53,3       | -7,18 | 4,14   |
| 32d     | 26 | 50  | DI | -54,8       | -7,83 | 7,84   |
| 33d     | 26 | 50  | DI | -55,1       | -7,9  | 8,1    |
| 34d     | 26 | 250 | DI | -50         | -5,96 | -2,32  |
| 35d     | 26 | 250 | DI | -50,8       | -6,14 | -1,68  |
| 36d     | 26 | 250 | DI | -50,6       | -6,17 | -1,24  |
| BS1 X_9 | 0  | 0   | BS | -55,3       | -8,24 | 10,62  |
| BS2 X_9 | 0  | 0   | BS | -55,3       | -8,16 | 9,98   |
| BS3 X_9 | 0  | 0   | BS | -54,5       | -8,2  | 11,1   |
| BS4 X_9 | 0  | 0   | BS | -54,9       | -8,18 | 10,54  |
| S2_1    | 0  | 0   | S  | -55,2       | -8,14 | 9,92   |
| S2_2    | 0  | 0   | S  | -55,1       | -8,13 | 9,94   |

7
